# Supplementary material for: Molecular elucidation of brain lipofuscin in aging and Neuronal Ceroid Lipofuscinosis
Source: Research Square preprint supplement (doi:10.21203/rs.3.rs-6010379/v1), 2025-03-19
Supplement: Supplementary file 1 [file 18639712d95b6803cccbcc2e.pdf]

# Molecular elucidation of brain lipofuscin in aging and Neuronal Ceroid Lipofuscinosis

Sofia Massaro Tieze<sup>1,2</sup>, Alexander Esqueda<sup>1,2</sup>, Rachel McAllister,<sup>3</sup> Matija Lagator<sup>4,5</sup>, Betül Yücel<sup>1</sup>, Eric Sun<sup>8</sup>, TuKiet T. Lam<sup>6,7</sup>, Nicholas Lockyer<sup>4</sup>, Kallol Gupta<sup>3</sup>, Sreeganga S. Chandra<sup>1,9,10,\*</sup>

<sup>1</sup>Departments of Neurology & Neuroscience, Yale University, New Haven, CT, USA

<sup>2</sup>Interdepartmental Neuroscience Program, Yale University, New Haven, CT, USA

<sup>3</sup>Department of Cell Biology, Yale University, New Haven, CT, USA

<sup>4</sup>Photon Science Institute, Department of Chemistry, University of Manchester, Manchester, UK

<sup>5</sup>Rosalind Franklin Institute, Rutherford Appleton Laboratory, Didcot, Oxfordshire, UK

<sup>6</sup>Departments of Molecular Biophysics and Biochemistry, Yale University, New Haven, CT, USA

<sup>7</sup>Keck Mass Spectrometry & Proteomics Resource, W.M. Keck Biotechnology Resource Laboratory, New Haven, CT, USA

<sup>8</sup>Yale College, Yale University, New Haven, CT, USA

<sup>9</sup>Senior author

<sup>10</sup>Lead contact

\*Correspondence: [sreeganga.chandra@yale.edu](mailto:sreeganga.chandra@yale.edu)

## SUPPLEMENTAL FIGURES

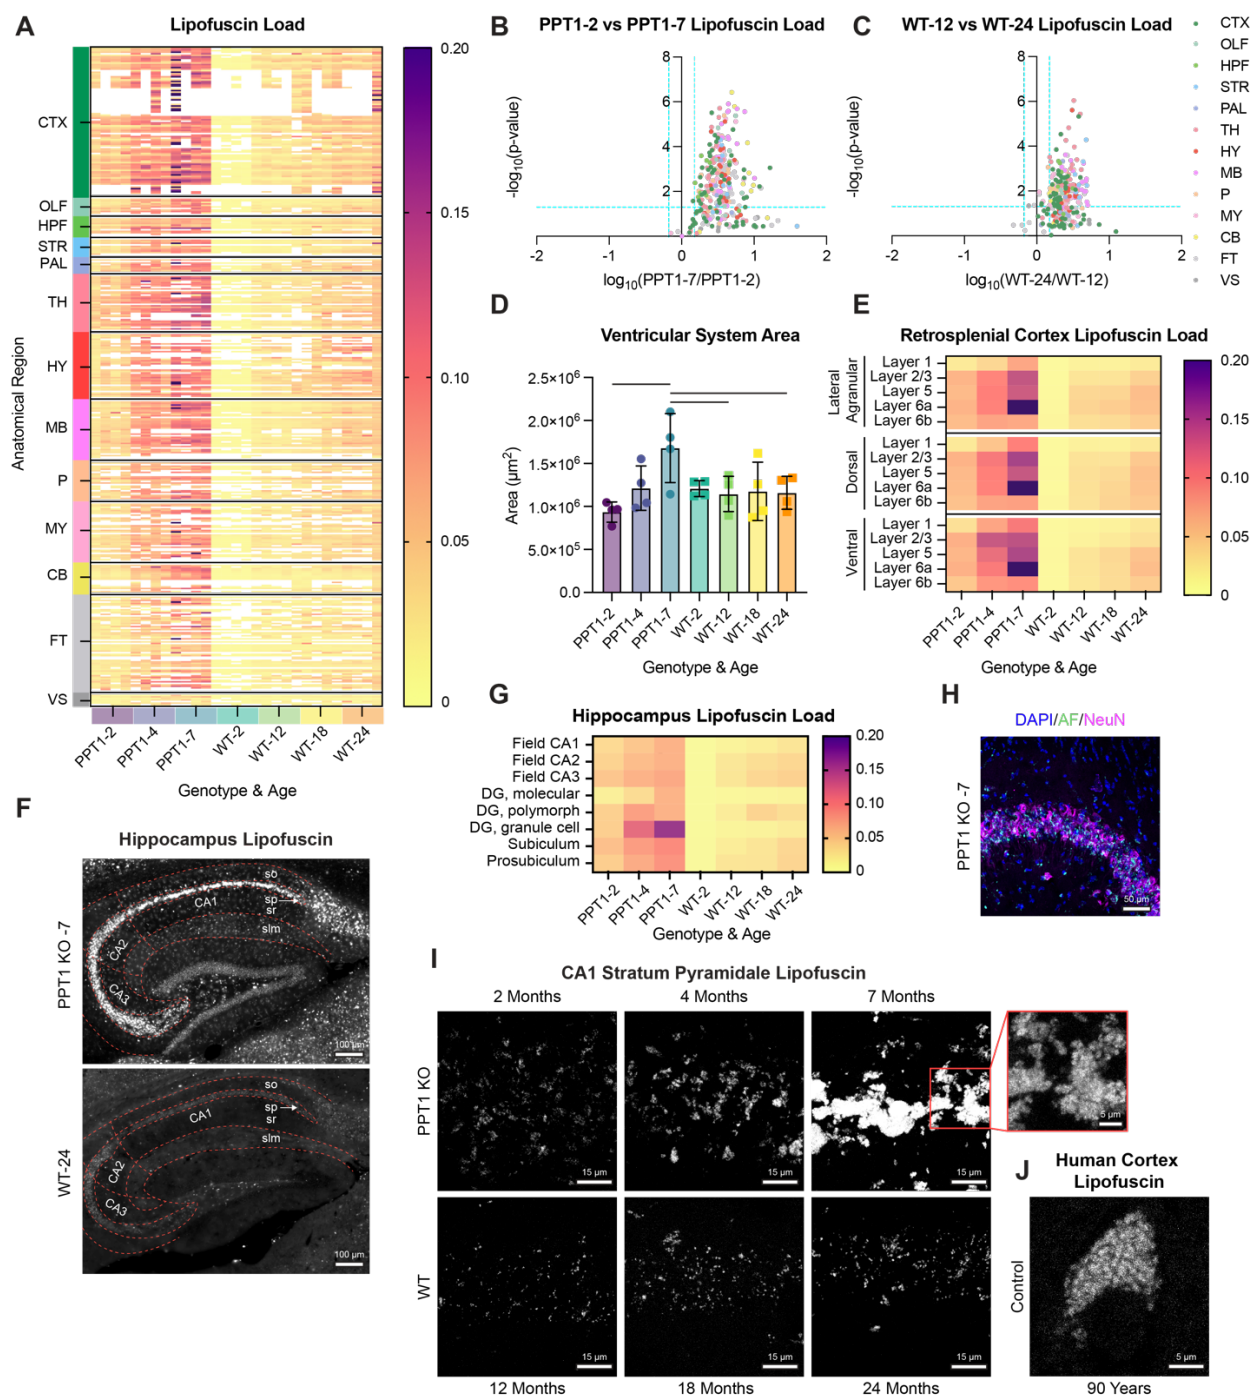

**Figure S1. Lipofuscin load increases across fine neuroanatomical regions with age and *CLN1* progression.**

(A) Heat map of lipofuscin load across fine anatomical regions ( $n = 4$  sex-matched biological replicates/genotype/timepoint;  $n = 4$  alternate sections/replicate). White cells indicate that region was not found in measured sections. Rows corresponding to regions with fewer than 2 measurements across all samples were not included. Color blocks on left correspond to location of region within Allen Mouse Brain Atlas as in **Fig. 1Biv** (CTX: isocortex; OLF: olfactory areas; HPF: hippocampal formation; STR: striatum; PAL: pallidum; TH: thalamus; HY: hypothalamus; MB: midbrain; P: pons; MY: medulla; CB: cerebellum; FT: fiber tracts; VS: ventricular systems). Color blocks on bottom correspond to age and genotype of animals as in **Fig. 1A**.

(B and C) Log fold-change comparisons of lipofuscin load by fine (points) and gross (color groups) anatomical regions with (B) *CLN1* progression in 2- vs 7-month-old PPT1 KO mice and with (C) natural aging in 12- vs. 24-month-old WT mice (blue dashed line significance threshold at fold change  $> 1.5$  and  $p < 0.05$ ).

(D) Quantification of ventricular system area ( $\mu\text{m}^2$ ) with age and *CLN1* progression ( $n = 4$  sex-matched biological replicates/genotype/timepoint;  $n = 4$  alternate sections/biological replicate). Lines indicate statistical comparisons where  $p < 0.05$  by Tukey's multiple comparison test.

(E) Heat map of lipofuscin load in lateral agranular (top) and dorsal (middle) and ventral (bottom) retrosplenial areas by cortical layer (average of  $n = 4$  sex-matched biological replicates/genotype/timepoint;  $n = 4$  alternate sections/replicate).

(F) Representative images of hippocampus autofluorescence in PPT1 KO 7-month (top) and WT 24-month (bottom) animals (scale bar,  $100 \mu\text{m}$ ). Red dashed lines indicate fine anatomical regions of fields CA1, CA2 and CA3 (so: *stratum oriens*; sp: *stratum pyramidale*; sr: *stratum radiatum*; slm: *stratum lacunosum-moleculare*).

(G) Heat map of lipofuscin load in hippocampal formation regions. Fields CA1, CA2, CA3 are averaged across fine regions shown in panel F (DG: dentate gyrus; average of  $n = 4$  sex-matched biological replicates/genotype/timepoint;  $n = 4$  alternate sections/replicate).

(H) PPT1 KO 7-month hippocampus *stratum pyramidale* with lipofuscin autofluorescence (AF; green), counterstained with nuclear marker DAPI (blue), and neuronal marker NeuN (magenta) (scale bar,  $50 \mu\text{m}$ ).

(I) Representative 63X images illustrating accumulation of autofluorescent lipofuscin granules in cells of *stratum pyramidale* layer of CA1 of hippocampus in PPT1 KO and WT mice with *CLN1* progression and age (scale bar,  $15 \mu\text{m}$ ). Inset shows region in red box at lower brightness to illustrate individual granules in saturated areas (scale bar,  $5 \mu\text{m}$ ).

(J) Representative lipofuscin-positive cell of dorsolateral prefrontal cortex of elderly human control (age = 90 years).

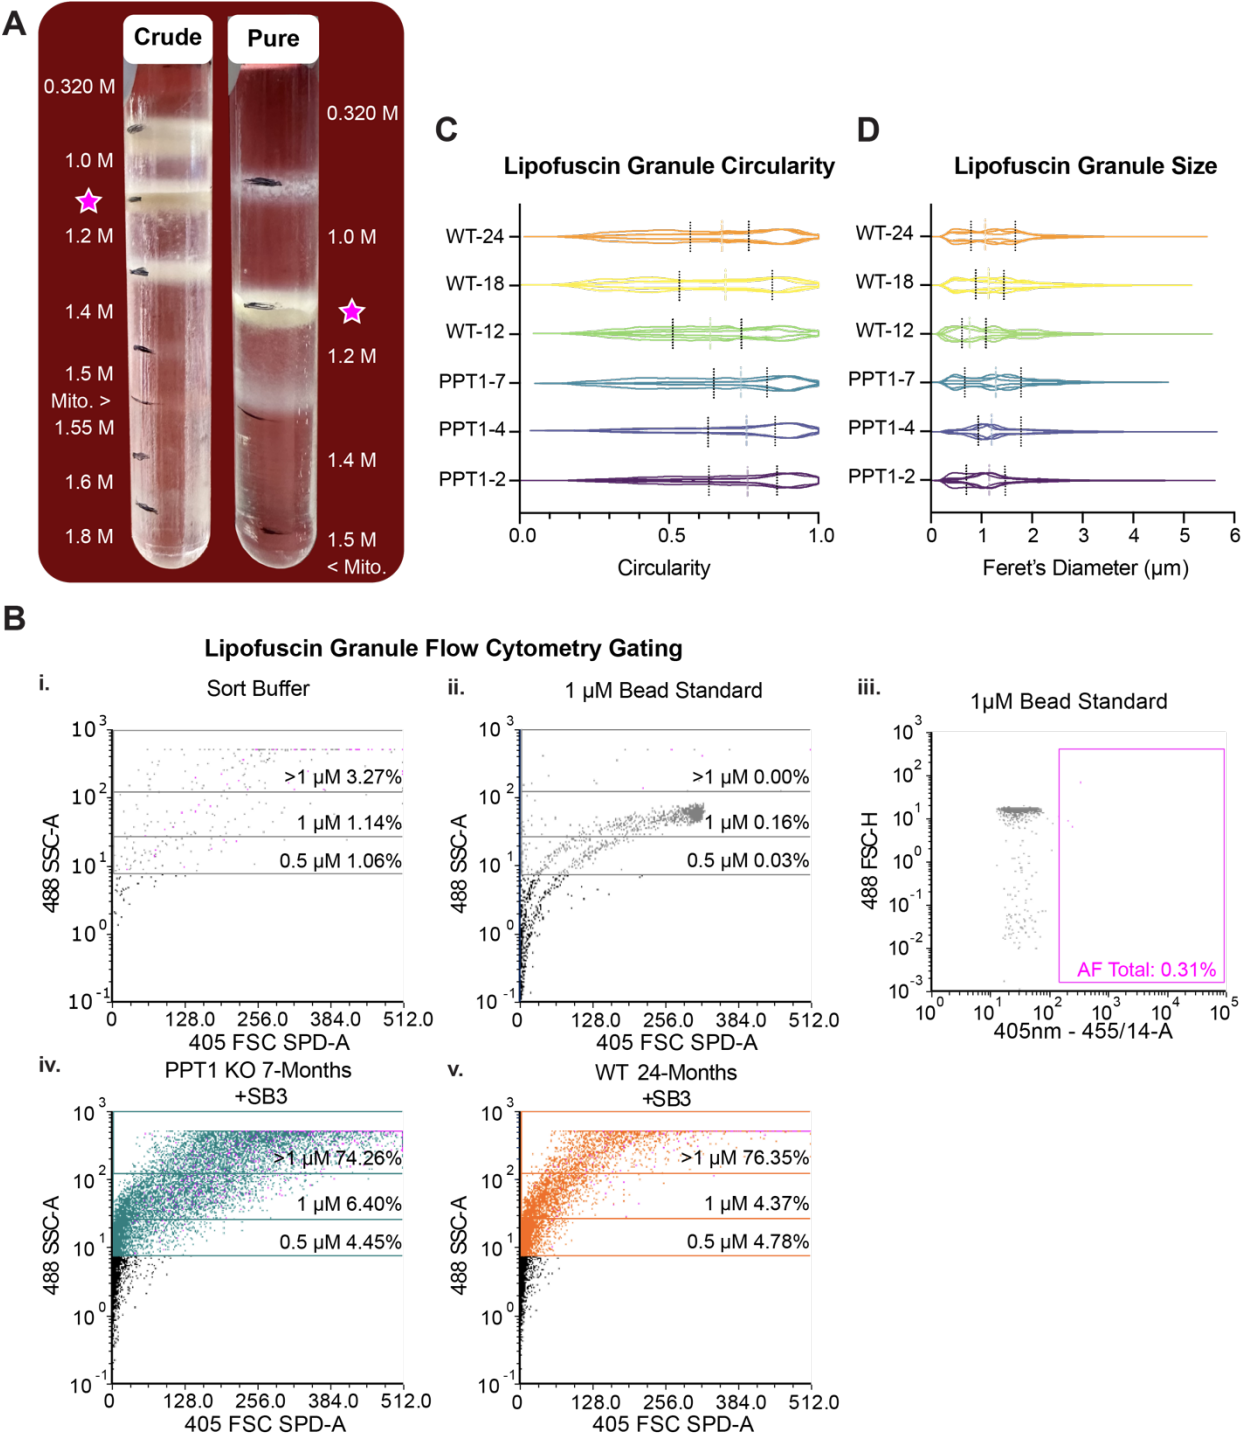

55 **Figure S2. Lipofuscin purification and flow-cytometry strategies.**

56 (A) Representative images of crude (left) and pure (right) sucrose gradients following ultracentrifugation.  
57 Yellow-brown autofluorescent fraction at 1.0-1.2 M sucrose interface is denoted by purple star. "Mito."  
58 indicates density at which healthy mitochondria sediment.

59 (B) Flow cytometry gating plots of (i) sort buffer control, (ii) 1  $\mu\text{m}$  plastic size-standard beads for small-  
60 particle gating, (iii) 1  $\mu\text{m}$  plastic size-standard beads approximating lipofuscin granule size excluded by  
61 autofluorescence gate, and SB3-stained lipofuscin from (iv) PPT1 KO 7-month and (v) WT 24-month  
62 animals illustrating majority of particles falling above 1  $\mu\text{m}$  in diameter.

63 (C-D) Quantification of bright field SB3-stained granule images for (C) particle circularity and (D) particle  
64 size (Feret's Diameter) ( $n = 3$  biological replicates/ genotype/ age;  $n = 5$  images/ replicate). Solid lines = 25<sup>th</sup>  
65 and 75<sup>th</sup> percentile and dashed lines = median for summed replicate data.

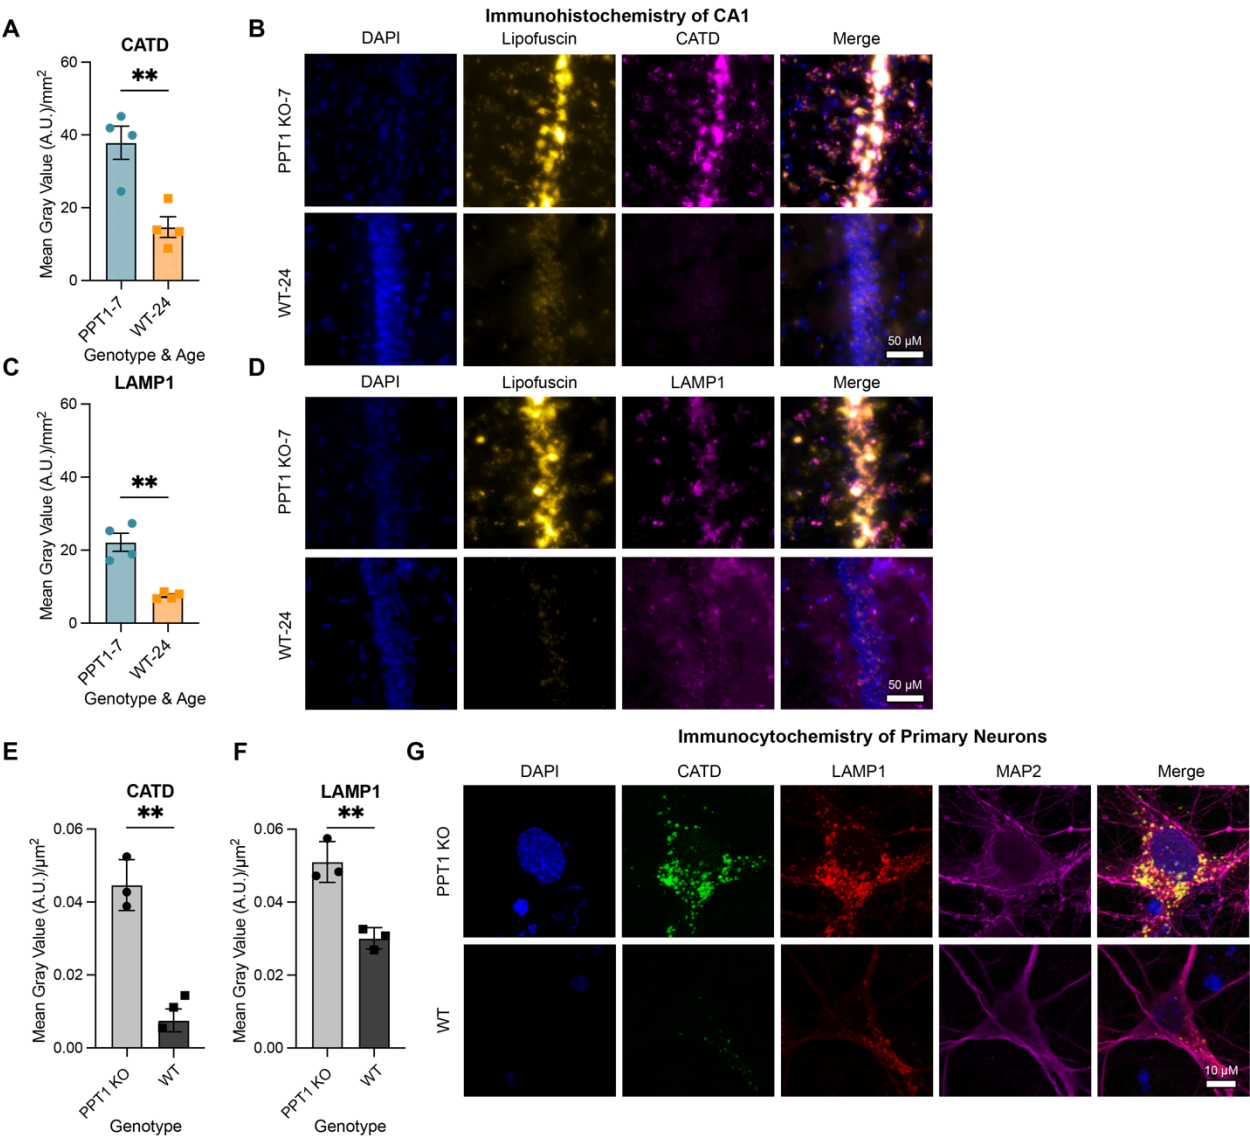

68 **Figure S3. PPT1 KO results in lysosome accumulation.**

69 (A) Quantification of cathepsin D (CATD) expression (mean gray value/mm<sup>2</sup>) in hippocampal formation  
70 of 7-month PPT1 KO and 24-month WT mice. Data are mean  $\pm$  SD of  $n = 4$  sex-matched biological replicates;  
71  $n = 4$  sections/replicate.

72 (B) Representative images of lipofuscin autofluorescence (yellow) and CATD expression (magenta) in CA1  
73 *stratum pyramidale* layer of hippocampus in 7-month PPT1 KO and 24-month WT mice with DAPI  
74 counterstain (blue) (scale bars, 50  $\mu$ m).

75 (C) Quantification of LAMP1 lysosomal marker expression (mean gray value/mm<sup>2</sup>) in the hippocampal  
76 formation of 7-month PPT1 KO and 24-month WT mice. Data are mean  $\pm$  SD of  $n = 4$  sex-matched biological  
77 replicates;  $n = 4$  sections/replicate.

78 (D) Representative images of lipofuscin autofluorescence (yellow) and LAMP1 expression (magenta) in  
79 CA1 *stratum pyramidale* layer of hippocampus in 7-month PPT1 KO and 24-month WT mice with DAPI  
80 counterstain (blue) (scale bars, 50  $\mu$ m).

81 (E-F) Quantification of (E) CATD and (F) LAMP1 expression (mean gray value/mm<sup>2</sup>) in MAP2 positive  
82 neurons (magenta) in PPT1 KO and WT primary cortical cultures at DIV14. Data are mean  $\pm$  SD of  $n = 3$   
83 independent cultures;  $n = 5$  neurons/culture.

84 (G) Representative images of CATD (green) and LAMP1 expression (red) in MAP2 positive neurons  
85 (magenta) with DAPI counterstain (blue) in PPT1 KO and WT primary cortical cultures at DIV14 (scale  
86 bars, 10  $\mu$ m).

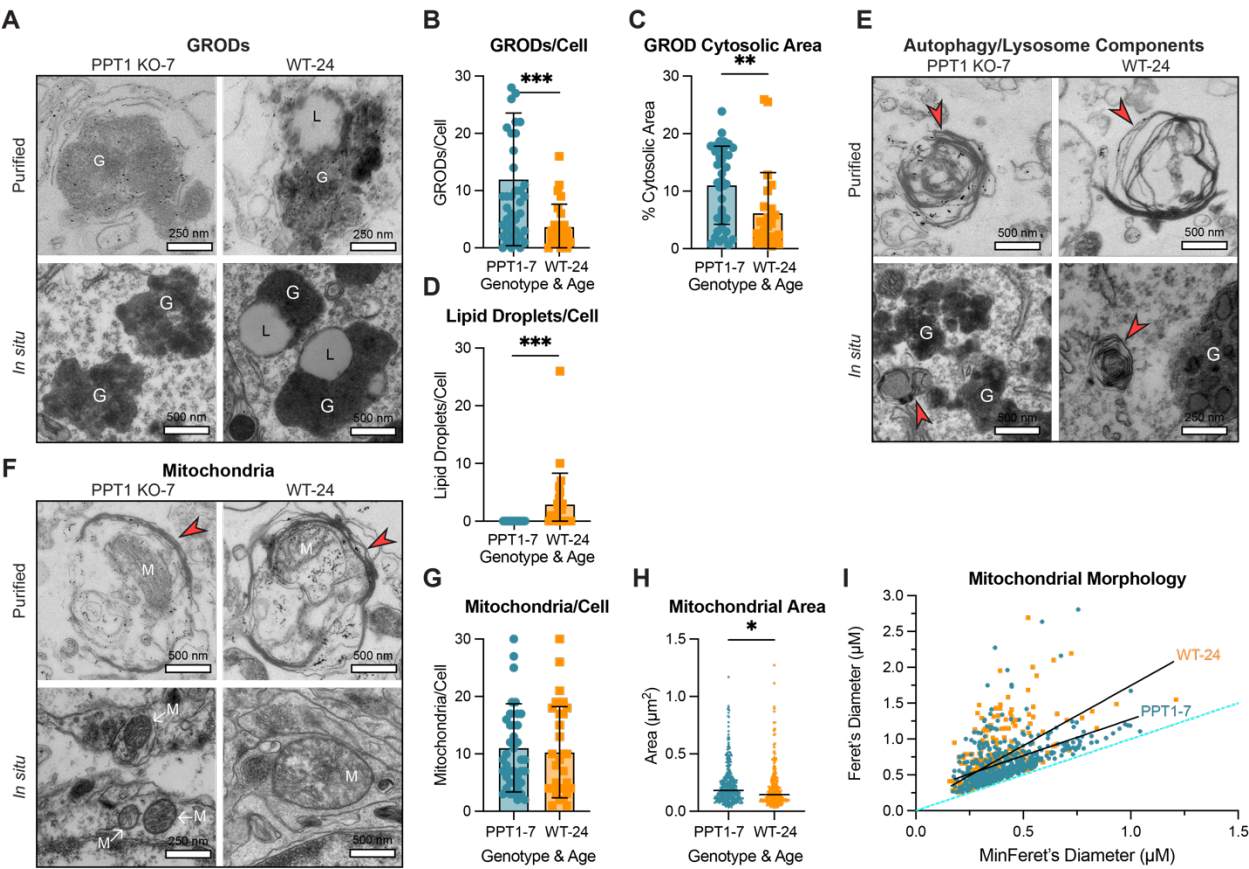



**Figure S4. Ultrastructure of *in situ* and purified lipofuscin.**

(A) Additional representative electron micrographs of granular osmiophilic deposit (GROD) structures (G) with associated lipid droplets (L) in purified lipofuscin (top) and *in situ* in PPT1 KO 7-month and WT 24-month brain (bottom) (scale bars, 250 or 500 nm).

(B) Quantification of electron micrographs of cytosolic GROD structures/cell in PPT1 KO 7-month and WT 24-month motor cortex and CA3 of hippocampus (\*\* indicates  $p < 0.001$  by two-tailed t-test; WT:  $n = 26$  cells; PPT1 KO:  $n = 41$  cells).

(C) Quantification of percentage (%) of cytosolic area taken up by GROD structures in PPT1 KO 7-month and WT 24-month motor cortex and CA3 of hippocampus (\*\* indicates  $p < 0.01$  by two-tailed t-test; WT:  $n = 26$  cells; PPT1 KO:  $n = 41$  cells).

(D) Quantification of number of lipid droplets per cell in PPT1 KO 7-month and WT 24-month motor cortex and CA3 of hippocampus (\*\*\*)  $p < 0.001$  by two-tailed t-test; WT:  $n = 26$  cells; PPT1 KO:  $n = 41$  cells).

(E) Additional representative electron micrographs of putative multilamellar lysosomes (red arrowheads) in purified autofluorescent fractions (top) and PPT1 KO 7-month and WT 24-month brain (bottom) (scale bars, 250 nm or 500 nm; G, GROD).

(F) Representative electron micrographs of mitochondria (M) with disordered, sparse, or degraded cristae in putative multilamellar lysosome structures (red arrows) in purified autofluorescent fraction (top) or near synaptic densities in PPT1 KO 7-month and WT 24-month brain (bottom) (scale bars, 250 or 500 nm).

(G) Quantification of mitochondrial number per cell soma in PPT1 KO 7-month and WT 24-month motor cortex and CA3 of hippocampus (not significant by two-tailed t-test; WT:  $n = 30$  cells; PPT1 KO:  $n = 40$  cells).

(H) Quantification of mitochondrial area in the soma of cells in PPT1 KO 7-month and WT 24-month motor cortex and CA3 of hippocampus (\*  $p < 0.05$  by unpaired two-tailed t-test; WT:  $n = 309$  mitochondria; PPT1 KO:  $n = 447$  mitochondria).

(I) Simple linear regression of Feret's diameter (maximum caliper) versus minFeret's diameter (minimum caliper) of mitochondria in PPT1 KO 7-month and WT 24-month motor cortex and CA3 of hippocampus (PPT1-7:  $y = 1.018 \cdot X + 0.2587$ ;  $R^2 = 0.2582$ ; WT-24:  $Y = 1.675 \cdot X + 0.07064$ ;  $R^2 = 0.3524$ ;  $p < 0.0001$  by F-test; WT:  $n = 309$  mitochondria; PPT1 KO:  $n = 447$  mitochondria). Blue dashed line represents perfect circularity ( $Y = 1 \cdot X$ ).

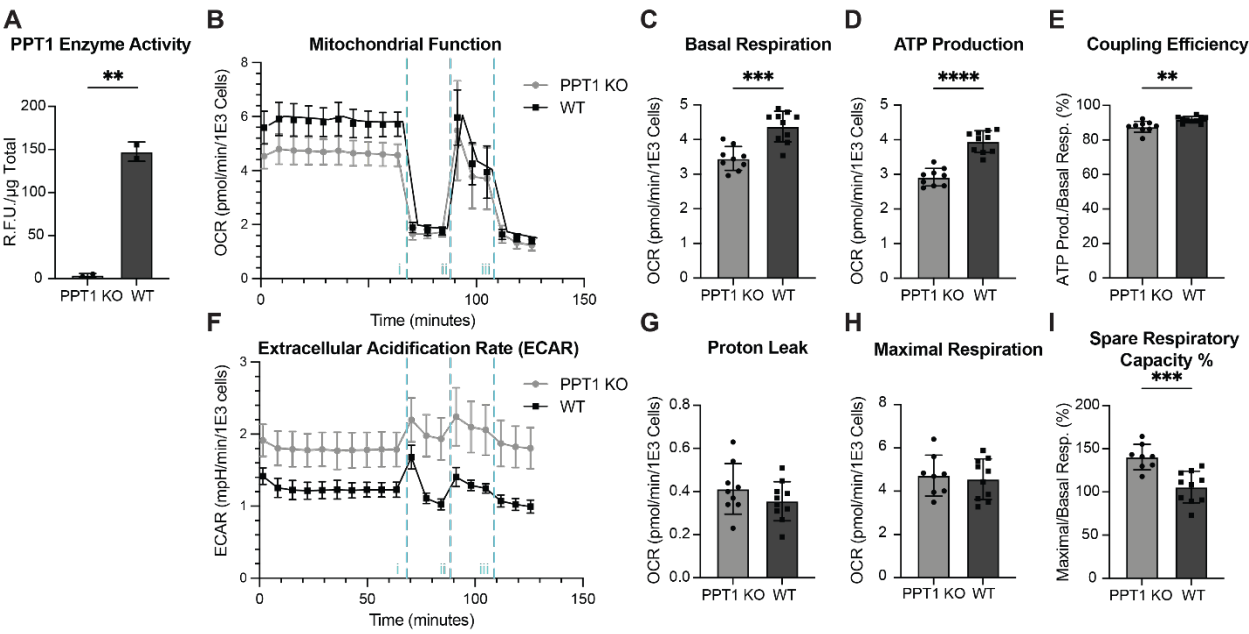

**Figure S5. PPT1 KO causes aberrant mitochondrial flux.**

(A) PPT1 enzyme activity in CRISPR-engineered HEK293T PPT1 KO cells and WT controls normalized to protein concentration ( $\mu\text{g}$ ) determined by BCA ( $n = 2$  independent cultures).

(B) Mitochondrial stress test with nutrient-deprivation performed on control (WT) and CRISPR-engineered PPT1 KO HEK293T cells, with sequential injections of mitochondrial inhibitors, (i) oligomycin A, (ii) FCCP, and (iii) rotenone/antimycin A (represented by vertical blue dashed lines), to determine effects on oxygen consumption rate (OCR). OCR measurements are normalized to cell number (per thousand cells) in each well. Parameters calculated from this metabolic flux signature are shown in the following panels.

(C) Basal respiration.

(D) ATP production.

(E) Coupling efficiency percent (%) (ATP production/basal respiration).

(F) Extracellular acidification rate (ECAR) with mitochondrial inhibitor injections as in panel A.

(G) Proton leak.

(H) Maximal respiration.

(I) Percentage of spare respiratory capacity (%) (maximal respiration/basal respiration). Data are mean  $\pm$  SD. \*  $p < 0.05$ , \*\*  $p < 0.01$ , \*\*\*  $p < 0.001$ , \*\*\*\*  $p < 0.0001$  by unpaired two-tailed t-test. Data shown are representative results from one of two independent experiments ( $n = 9$ -10 replicate wells/genotype).

A

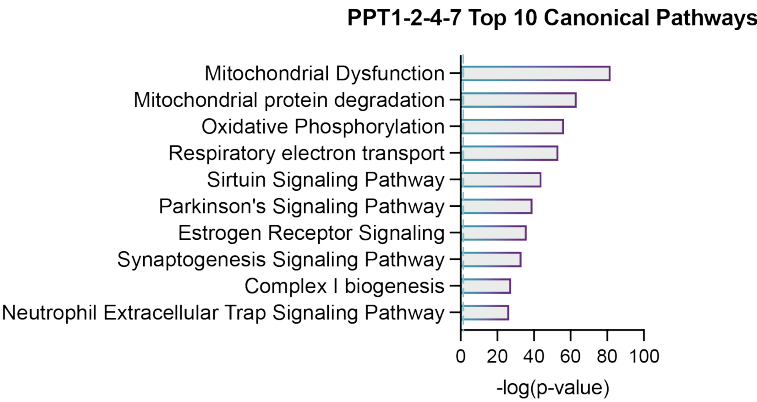

B

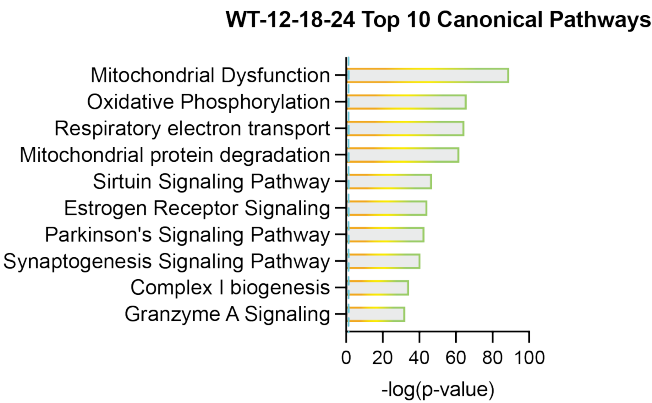

C

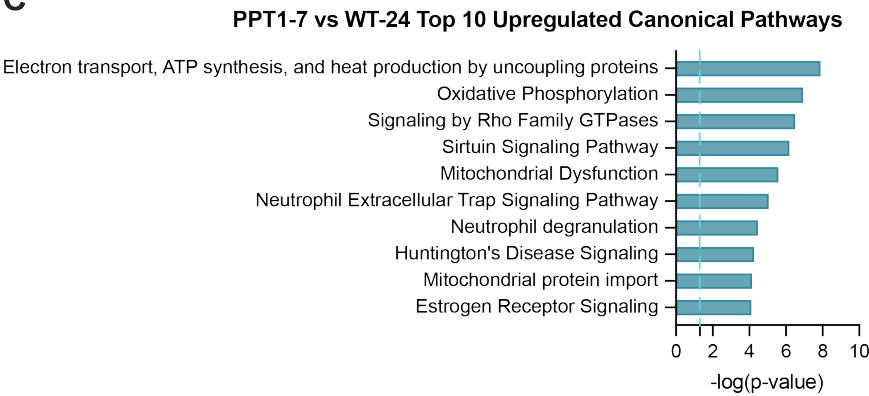

D

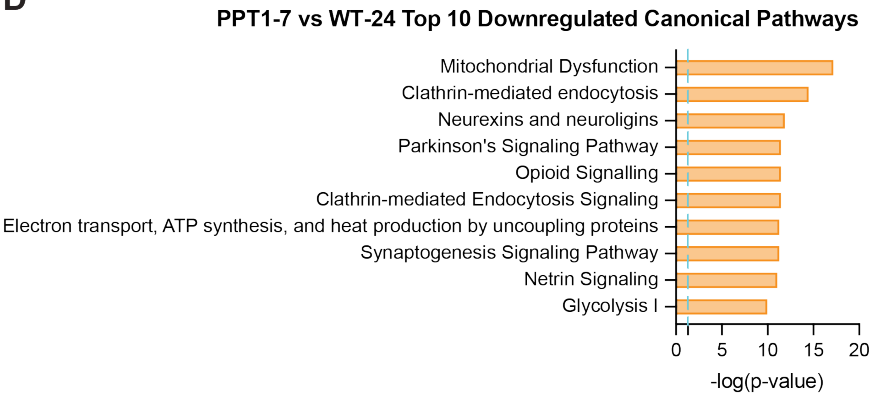

139 **Figure S6. Ingenuity Pathway Analysis (IPA) of lipofuscin proteins.**  
140 Top 10 canonical pathways by Ingenuity Pathway Analysis of:  
141 (A) Consensus PPT1 KO lipofuscin proteins across timepoints ( $n = 745$ ) (**Fig. 3A**).  
142 (B) Consensus WT lipofuscin proteins across timepoints ( $n = 957$ ) (**Fig. 3A**).  
143 (C) Significantly upregulated lipofuscin proteins in PPT1 KO 7-month/WT 24-month samples ( $n = 83$ ) (**Fig.**  
144 **3N**).  
145 (D) Significantly downregulated lipofuscin proteins in PPT1 KO 7-month/WT 24-month samples ( $n = 348$ )  
146 (**Fig. 3N**).  
147 Blue dashed line indicates significance threshold at  $p = 0.05$ , throughout.

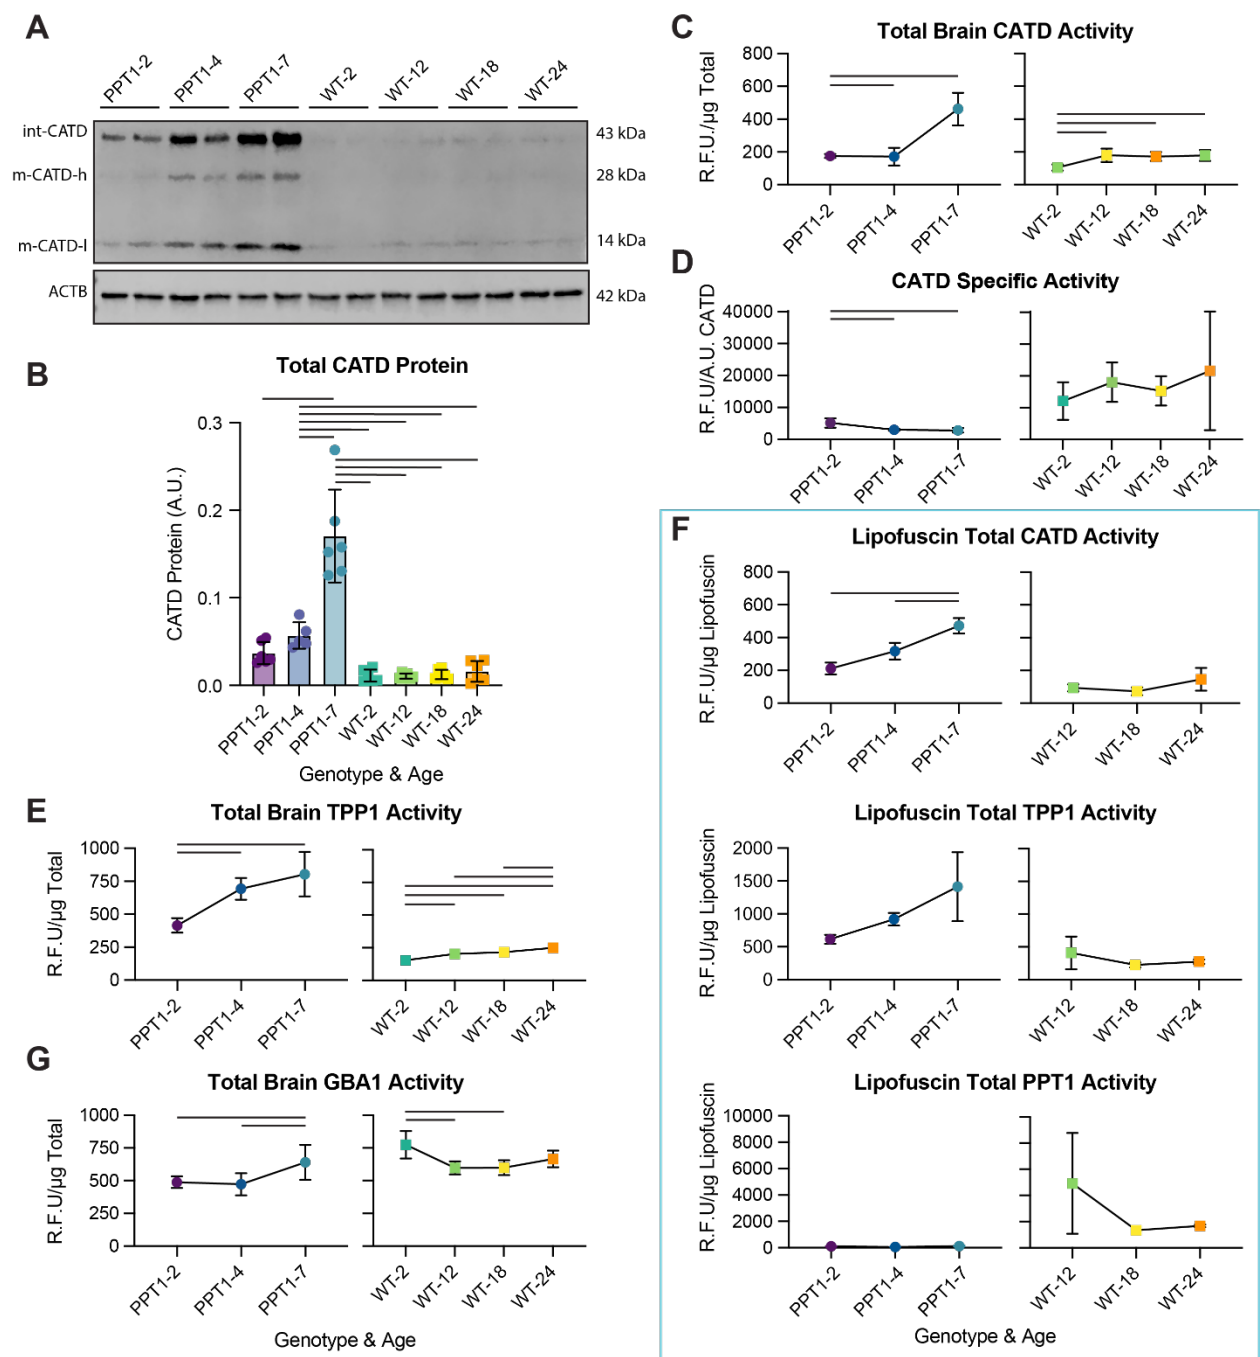

**Figure S7. Levels and activity of enzymes implicated in lipofuscin biogenesis.**

(A) Representative quantitative immunoblots of cathepsin D (CATD) across *CLN1* and aging conditions with actin (ACTB) loading control in total brain homogenates ( $n = 5-6$  biological replicates/genotype/timepoint; int = intermediate; m = mature; h = heavy chain; l = light chain).

(B) Quantification of immunoblots of CATD protein in total brain homogenates (A.U.), normalized to actin loading control ( $n = 5-6$  biological replicates/genotype/timepoint).

(C) Bulk CATD enzyme activity (R.F.U.) in total brain fractions normalized to total protein ( $\mu\text{g}$ ) determined by BCA ( $n = 4-5$  biological replicates/genotype/age).

(D) Specific enzyme activity of CATD (R.F.U. / A.U. total CATD protein) in total brain homogenates ( $n = 4-5$  biological replicates/genotype/age).

(E) Bulk TPP1 enzyme activity (R.F.U.) in total brain fractions normalized to total protein ( $\mu\text{g}$ ) determined by BCA ( $n = 4-5$  biological replicates/genotype/age).

(F) Bulk CATD, TPP1, and PPT1 enzyme activity (R.F.U.) in lipofuscin fractions ( $n = 3-5$  biological replicates/genotype/age;  $n = 2$  biological replicates for PPT1-4).

(G) Bulk GBA1 enzyme activity (R.F.U.) in total brain fractions normalized to total protein ( $\mu\text{g}$ ) determined by BCA ( $n = 5-6$  biological replicates/genotype/age).

Data are mean  $\pm$  SD. Horizontal bars represent significant comparisons ( $p < 0.05$ ) by 2-way ANOVA with Tukey's multiple comparisons test for immunoblot quantification and by one-way ANOVA with Tukey's multiple comparisons test for enzyme activity, throughout.

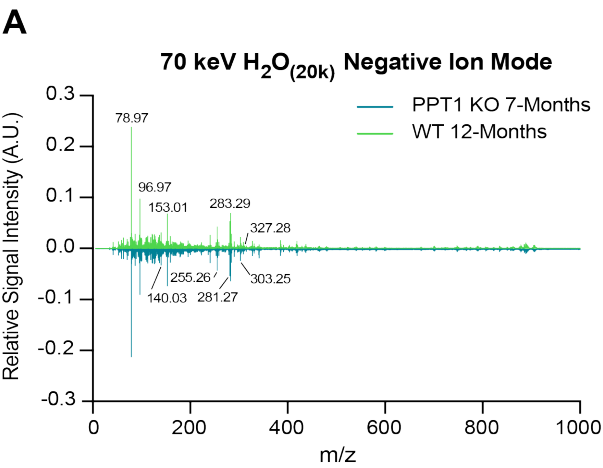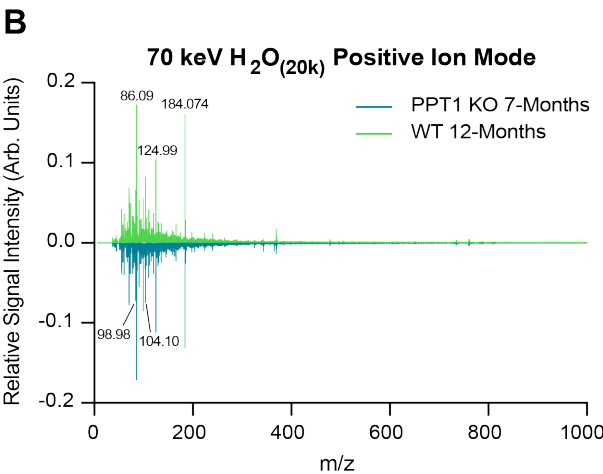



171 **Figure S8. ToF-SIMS spectra of purified lipofuscin.**

172 (A-B) ToF-SIMS spectra of purified lipofuscin from PPT1 KO 7-month and WT 12-month mice (average of  
173  $n = 3$  biological replicates) run using a 70 keV Gas Cluster Ion Beam (GCIB) in (A) negative ion mode and  
174 (B) positive ion mode with  $(\text{H}_2\text{O})_{20000}$  clusters with major peak mass-to-charge values ( $m/z$ ) highlighted.

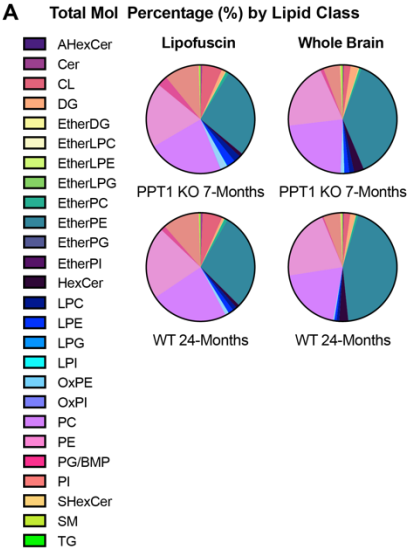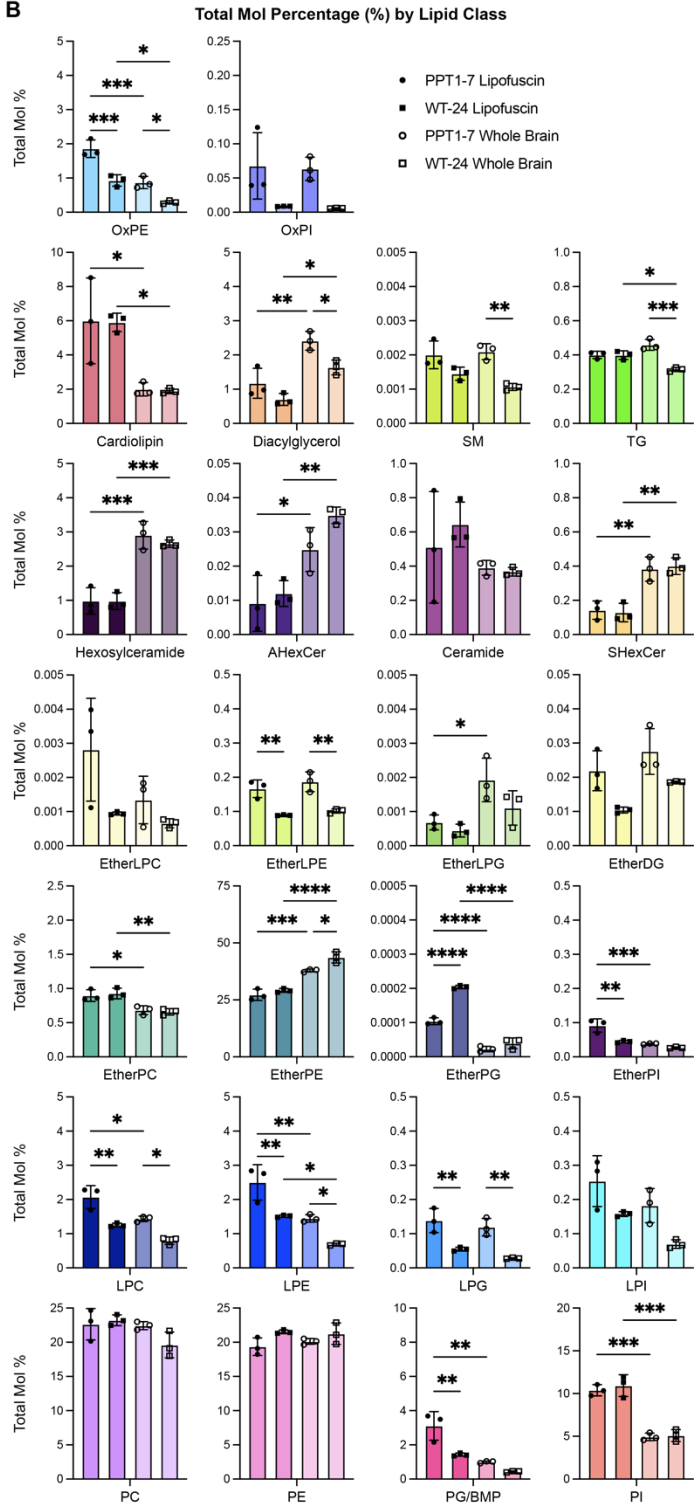

177 **Figure S9. Composition of lipofuscin and total brain by lipid class.**

178 (A) Pie-charts of total mol % by lipid class for lipofuscin (left) and whole brain (right) for PPT1 KO 7-month  
179 samples (top) and WT 24-month samples (bottom). Statistical comparisons for each class are shown in  
180 adjacent bar graphs.

181 (B) Percent (%) contribution of lipid classes to total lipid content of lipofuscin and total brain from PPT1 7-  
182 month and WT 24-month mice. A-CAHexCer: acyl-hexosylceramide; Cer: ceramide; CL: cardiolipin; DG:  
183 diglyceride (diacylglycerol); EtherDG: ether-linked diglyceride; EtherLPC: ether-linked  
184 lysophosphatidylcholine; EtherLPE: ether-linked lysophosphatidylethanolamine; EtherLPG: ether-linked  
185 lysophosphatidylglycerol; EtherPC: ether-linked phosphatidylcholine; EtherPE: ether-linked  
186 phosphatidylethanolamine; EtherPG: ether-linked phosphatidylglycerol; EtherPI: ether-linked  
187 phosphatidylinositol; HexCer: hexosylceramide; LPC: lysophosphatidylcholine; LPE:  
188 lysophosphatidylethanolamine; LPG: lysophosphatidylglycerol; LPI: lysophosphatidylinositol; OxPE:  
189 oxidized phosphatidylethanolamine; OxPI: oxidized phosphatidylinositol; PC: phosphatidylcholine; PE:  
190 phosphatidylethanolamine; PG/BMP: phosphatidylglycerol/bis(monoacylglycerol)phosphate; PI:  
191 phosphatidylinositol; SHexCer: sulfatide; SM: sphingomyelin; TG: triglyceride (triacylglycerol).

192 Data are mean  $\pm$  SD. \*  $p < 0.05$ , \*\*  $p < 0.01$ , \*\*\*  $p < 0.001$  by one-way ANOVA with Tukey's multiple  
193 comparisons test.

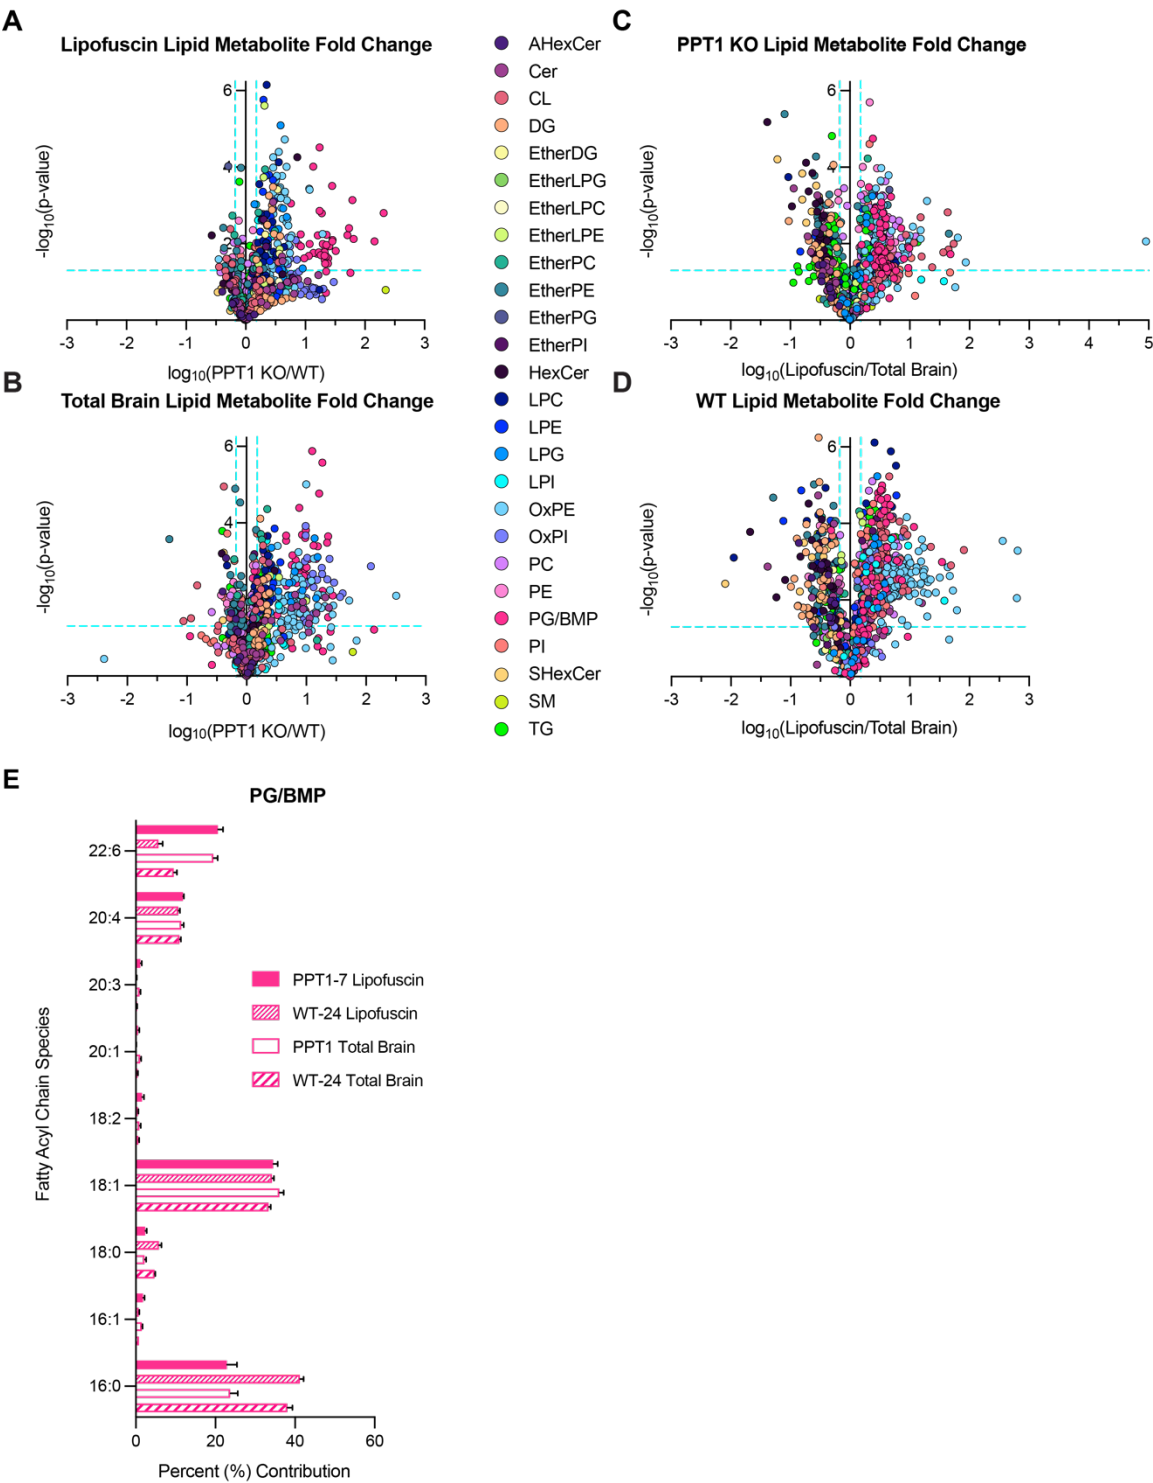

196 **Figure S10. Lipofuscin-enriched lipids and PG/BMP fatty acyl composition.**

197 (A-D) Lipid metabolite fold-change comparisons between (A) WT 24-month and PPT1 KO 7-month  
 198 lipofuscin, (B) WT 24-month and PPT1 KO 7-month total brain, (C) PPT1 KO 7-month lipofuscin and total  
 199 brain, (D) WT 24-month lipofuscin and total brain. Colors represent lipid classes. Blue dashed lines indicate  
 200 significant thresholds at 1.5-fold-change and  $p = 0.05$  ( $n = 3$  biological replicates/genotype). AHexCer: acyl-  
 201 hexosylceramide; Cer: ceramide; CL: cardiolipin; DG: diglyceride (diacylglycerol); EtherDG: ether-linked  
 202 diglyceride; EtherLPC: ether-linked lysophosphatidylcholine; EtherLPE: ether-linked  
 203 lysophosphatidylethanolamine; EtherLPG: ether-linked lysophosphatidylglycerol; EtherPC: ether-linked  
 204 phosphatidylcholine; EtherPE: ether-linked phosphatidylethanolamine; EtherPG: ether-linked  
 205 phosphatidylglycerol; EtherPI: ether-linked phosphatidylinositol; HexCer: hexosylceramide; LPC:  
 206 lysophosphatidylcholine; LPE: lysophosphatidylethanolamine; LPG: lysophosphatidylglycerol; LPI:  
 207 lysophosphatidylinositol; OxPE: oxidized phosphatidylethanolamine; OxPI: oxidized  
 208 phosphatidylinositol; PC: phosphatidylcholine; PE: phosphatidylethanolamine; PG/BMP:  
 209 phosphatidylglycerol/bis(monoacylglycero)phosphate; PI: phosphatidylinositol; SHexCer: sulfatide; SM:  
 210 sphingomyelin; TG: triglyceride (triacylglycerol).

211 (E) Percent (%) contribution (>1%) of fatty acyl chain species to PG/BMP isomer composition in PPT1 KO  
 212 7-month and WT 24-month lipofuscin and total brain ( $n = 3$  biological replicates).
